# Supplementary material
Source: Springer Nature journal article supplement (https://www.springermedizin.de/resource/supplementary/12875_2011_581_MOESM2_ESM.pdf/9435026)
Supplement: MOESM2 [file 9435026]

### Alcohol

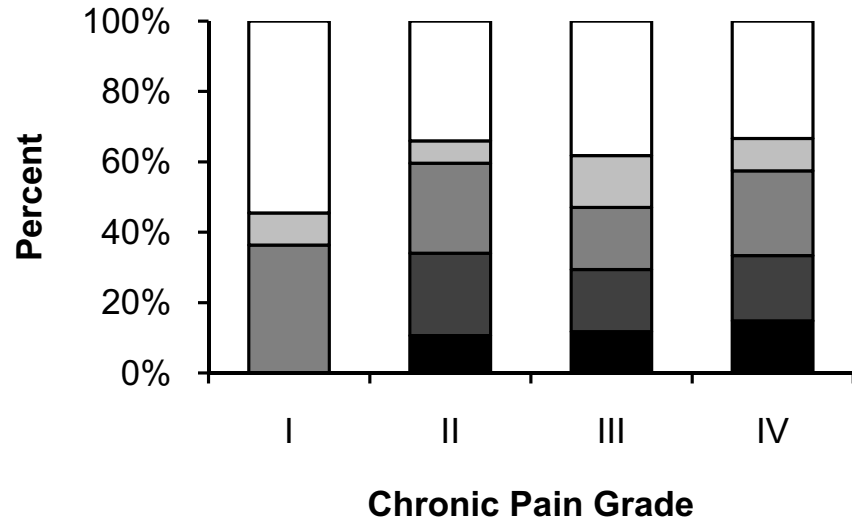

### Marijuana

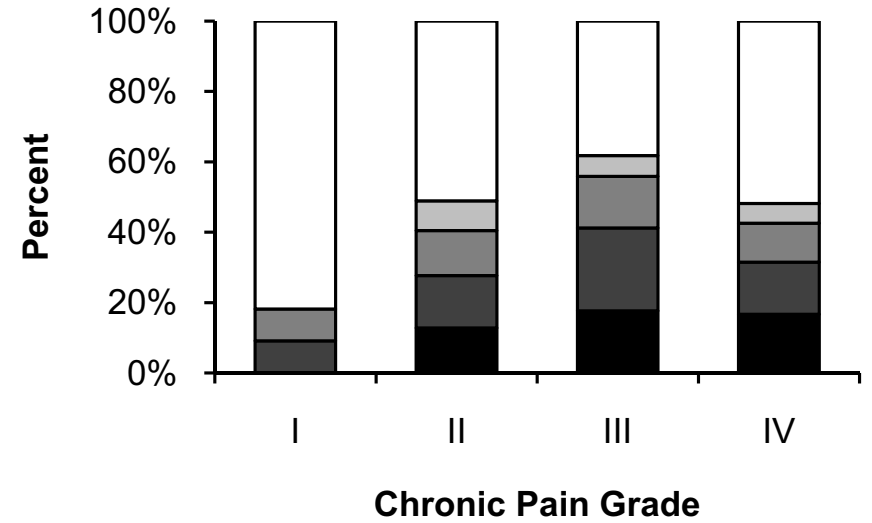

### Cocaine

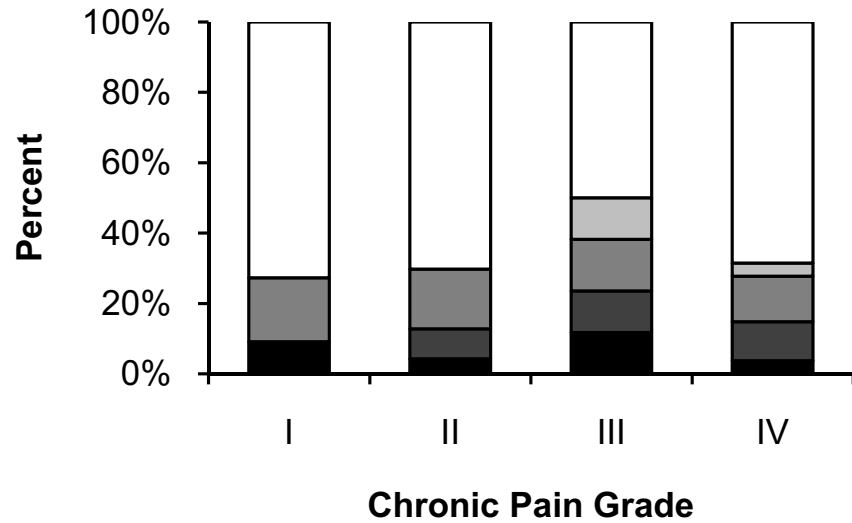

### Opiates

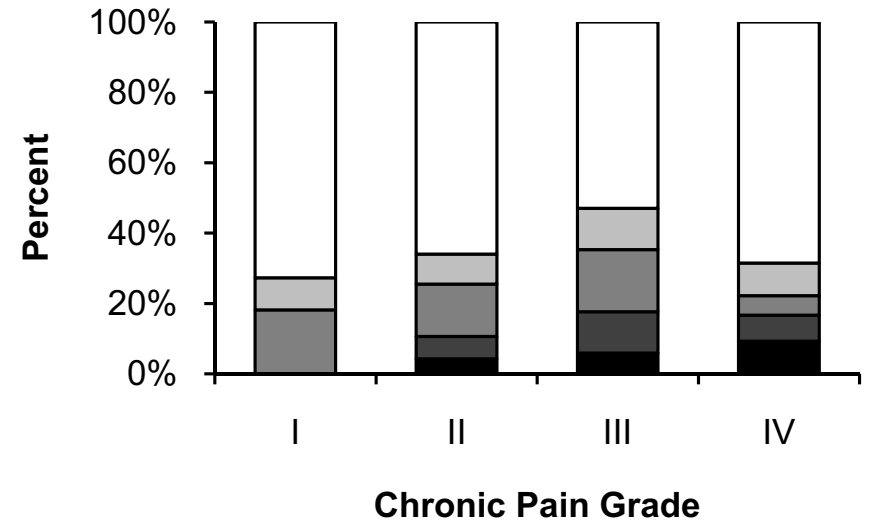

■ Daily ■ More than once per week ■ 1-4 times per month ■ Less than once per month □ Non-user
